# Supplementary material for: Molybdenum and cobalt co-doped VC nanoparticles encapsulated in nanocarbon as efficient electrocatalysts for the hydrogen evolution reaction
Source: Royal Society of Chemistry journal article supplement (doi:10.1039/d1qi01313k), 2022-01-01
Supplement: d1qi01313k1.pdf [file d1qi01313k1.pdf]

Supporting Information (SI):

**Molybdenum and cobalt co-doped VC nanoparticles  
encapsulated in nanocarbon as efficient electrocatalysts for  
hydrogen evolution reaction**

Xiaoyi Li<sup>a</sup>, Jianfeng Huang<sup>\*a</sup>, Liangliang Feng<sup>\*a</sup>, Danyang He<sup>a</sup>, Zixuan Liu<sup>b</sup>,

Guodong Li<sup>c</sup>, Ning Zhang<sup>a</sup>, Yongqiang Feng<sup>a</sup>, Liyun Cao<sup>\*a</sup>

<sup>a</sup> School of Material Science and Engineering, International S&T Cooperation Foundation of Shaanxi Province , Xi'an Key Laboratory of Green Manufacture of Ceramic Materials, Key Laboratory of Auxiliary Chemistry and Technology for Chemical Industry, Ministry of Education, Shaanxi University of Science and Technology, Xi'an 710021, P. R. China.

<sup>b</sup> Faculty of Engineering, University of Nottingham, University Park, Nottingham NG7 2RD, UK

<sup>c</sup> State Key Laboratory of Inorganic Synthesis and Preparative Chemistry, College of Chemistry, Jilin University, Changchun 130012, P. R. China.

\* Corresponding authors

E-mail: [huangjf@sust.edu.cn](mailto:huangjf@sust.edu.cn); [fengl@l@sust.edu.cn](mailto:fengl@l@sust.edu.cn); [2644245930@qq.com](mailto:2644245930@qq.com)

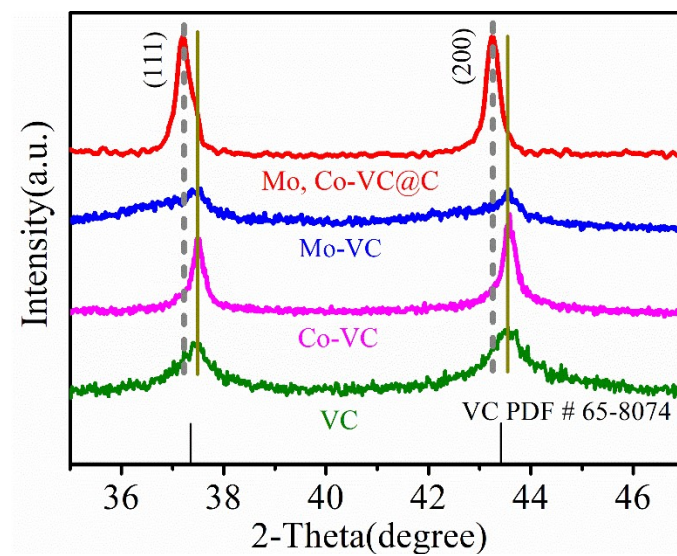

**Fig. S1** XRD patterns with zoomed-in image of VC, Mo-VC, Co-VC and Mo, Co-VC@C.

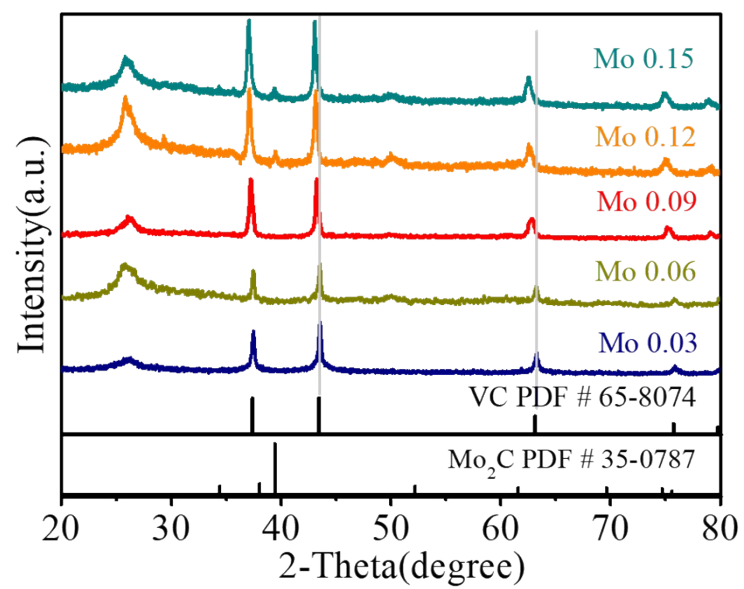

**Fig. S2** XRD patterns of samples with different Mo-doping amounts.

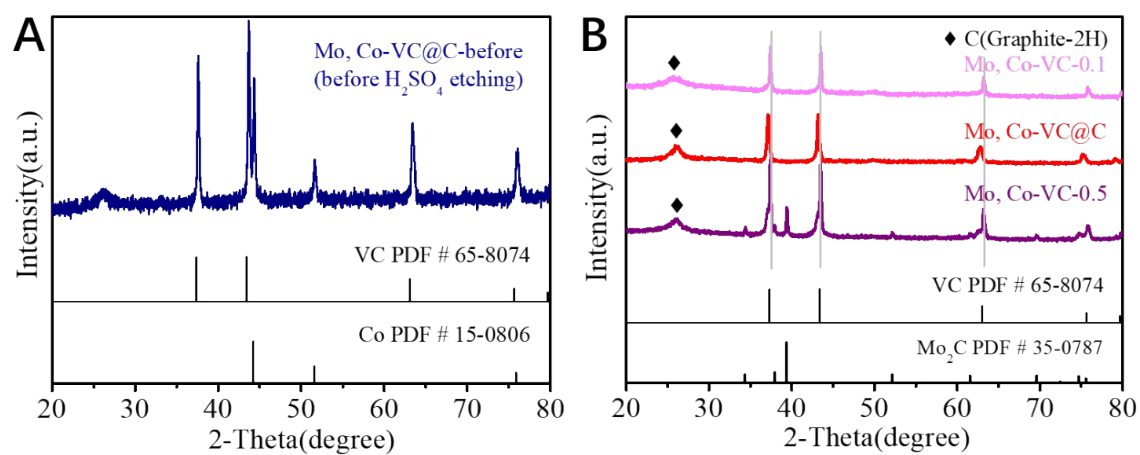

**Fig. S3** XRD patterns of (A) Mo, Co-VC@C-before (before  $H_2SO_4$  etching); (B) Mo, Co-VC-0.1 (Co 0.1g), Mo, Co-VC@C (Co 0.3 g) and Mo, Co-VC-0.5 (Co 0.5g).

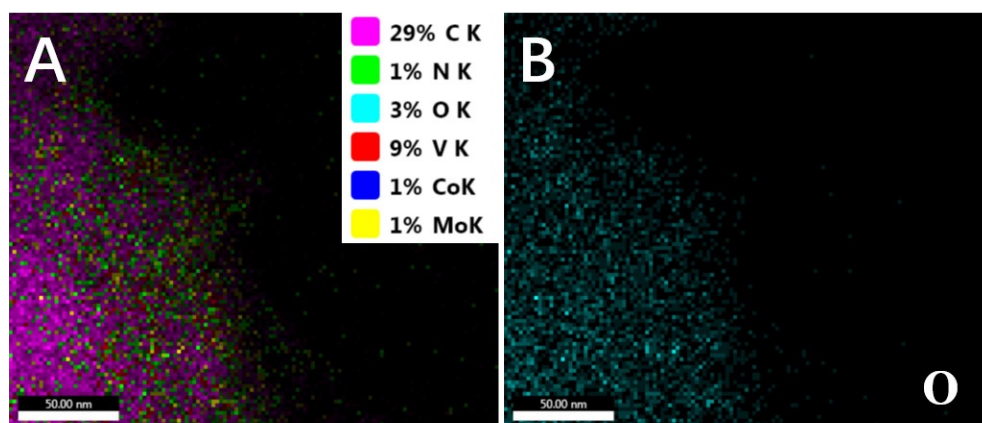

**Fig. S4** (A-B) The elemental mapping images of Mo, Co-VC@C.

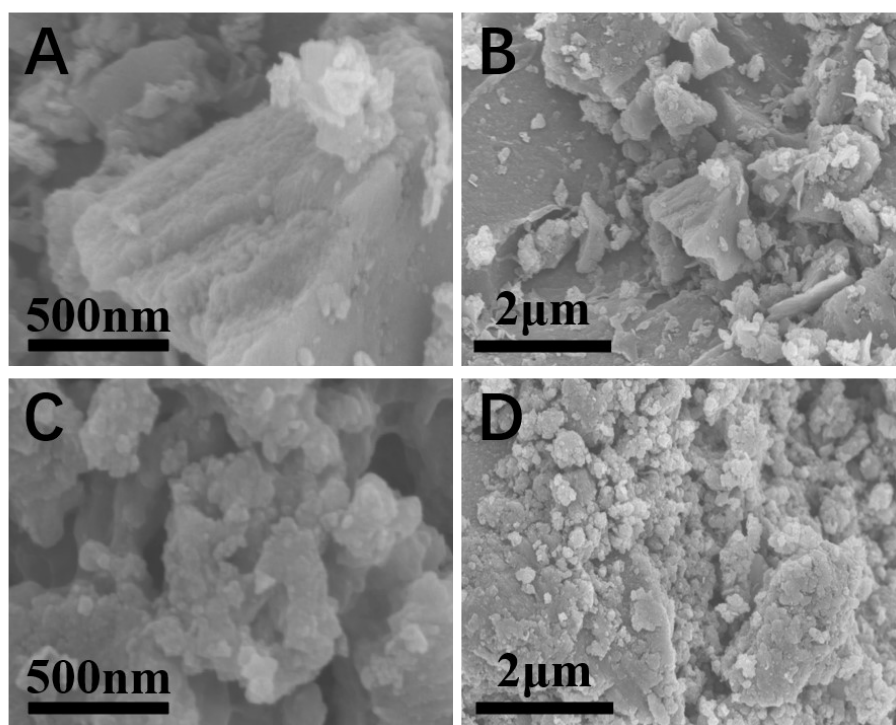

**Fig. S5** (A-B) SEM images of VC; (C-D) SEM images of Mo, Co-VC@C.

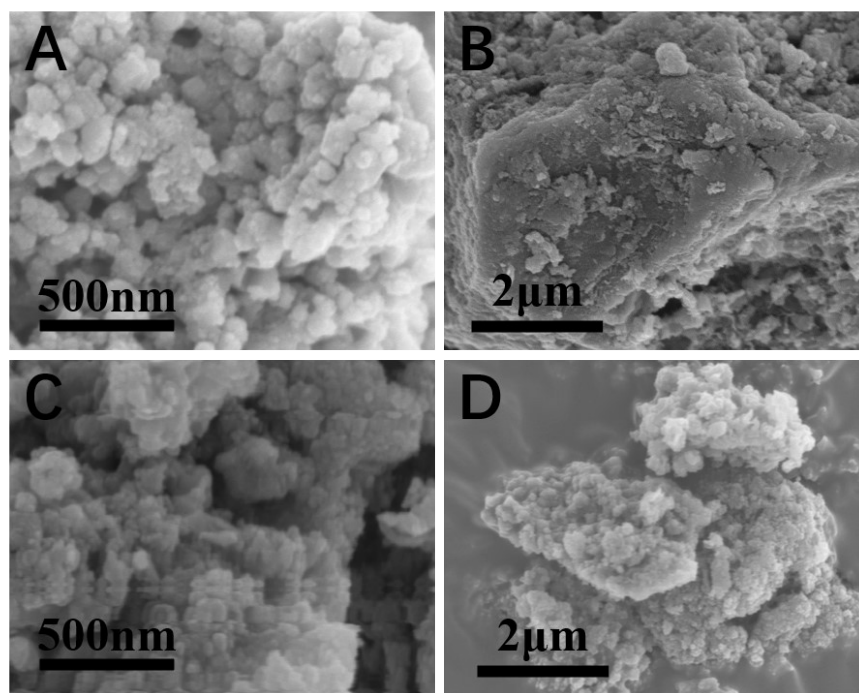

**Fig. S6** (A-B) SEM images of Mo, Co-VC-0.1 (Co 0.1g); (C-D) SEM images of Mo, Co-VC-0.5 (Co 0.5g).

**Table S1.** Peak properties of Mo, Co-VC@C and VC.

| Samples                 | Peaks | Position, 2<br>theta (°) | FWHM<br>(radians) | Calculated<br>crystallite<br>size (D, nm) | Calculated<br>average<br>crystallite<br>size (D', nm) |
|-------------------------|-------|--------------------------|-------------------|-------------------------------------------|-------------------------------------------------------|
| <b>Mo, Co-<br/>VC@C</b> | Peak1 | 26.09294                 | 5.8079            | 1.40408514                                | <b>2.798167747</b>                                    |
|                         | Peak2 | 37.22031                 | 17.15777          | 0.488559966                               |                                                       |
|                         | Peak3 | 43.32616                 | 0.75475           | 11.32564561                               |                                                       |
|                         | Peak4 | 62.80551                 | 52.57823          | 0.177024122                               |                                                       |
|                         | Peak5 | 75.21084                 | 10.25644          | 0.977700988                               |                                                       |
|                         | Peak6 | 79.14802                 | 4.26596           | 2.415990661                               |                                                       |
| <b>VC</b>               | Peak1 | 26.30134                 | 4.80451           | 1.698037387                               | <b>3.510623493</b>                                    |
|                         | Peak2 | 37.44705                 | 0.98751           | 8.494298705                               |                                                       |
|                         | Peak3 | 43.57816                 | 1.51291           | 5.655012455                               |                                                       |
|                         | Peak4 | 63.33178                 | 2.06729           | 4.515032725                               |                                                       |
|                         | Peak5 | 78.75982                 | 29.14271          | 0.352671431                               |                                                       |
|                         | Peak6 | 78.85275                 | 29.49526          | 0.348688253                               |                                                       |

**Table S2.** ICP data of Mo, Co-VC@C.

| Elements | The mass percentage (%) |
|----------|-------------------------|
| Mo       | 3.205                   |
| Co       | 0.017                   |
| V        | 15.020                  |

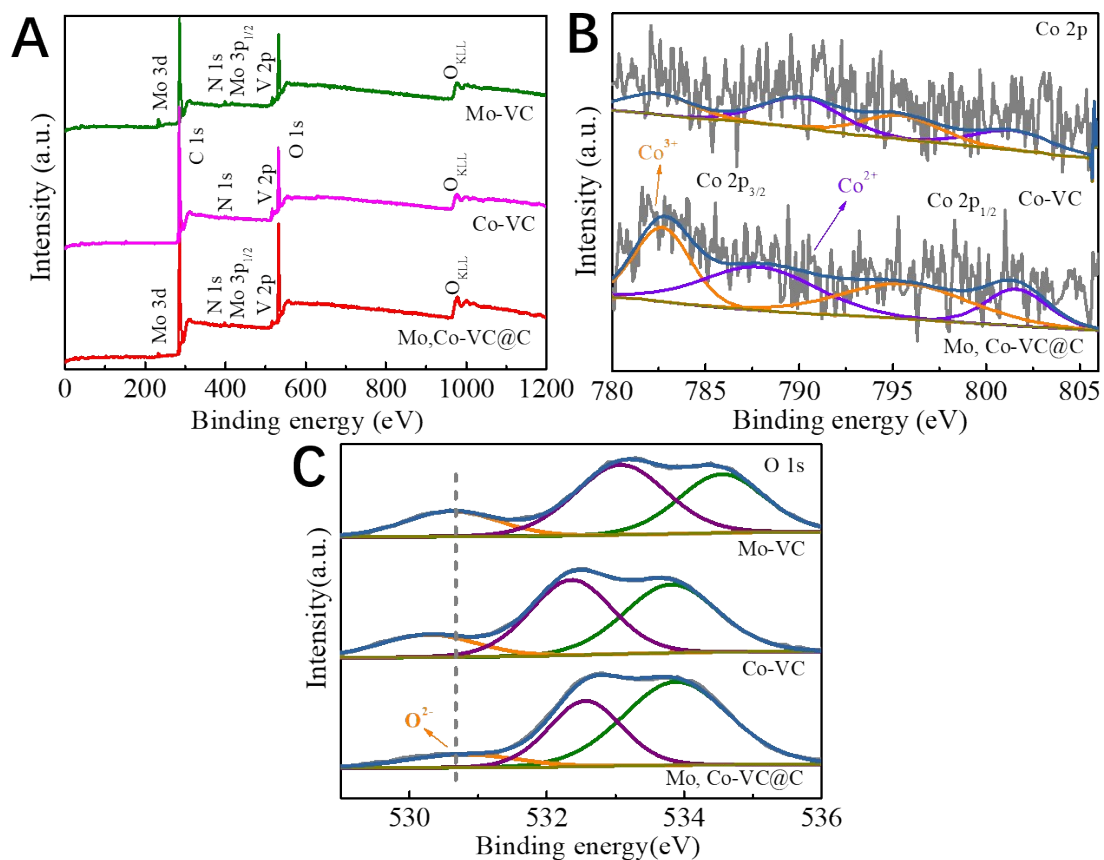

**Fig. S7** (A) XPS survey spectra of Mo-VC, Co-VC and Mo, Co-VC@C; (B) Co 2p XPS spectrum of Co-VC and Mo, Co-VC@C; and (C) O 1s XPS spectrum of Mo-VC, Co-VC and Mo, Co-VC@C.

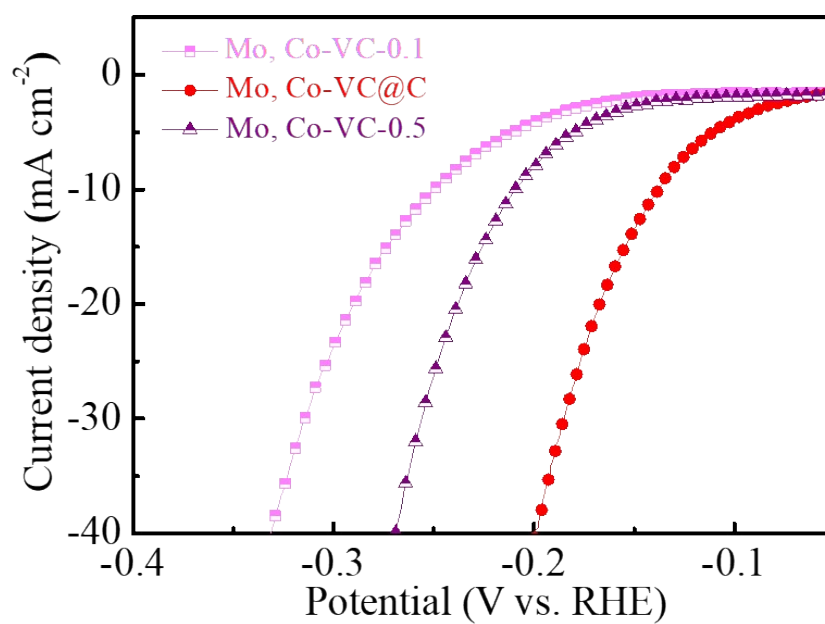

**Fig. S8** HER Polarization curves of Mo, Co-VC-0.1 (Co 0.1g), Mo, Co-VC@C (Co 0.3 g) and Mo, Co-VC-0.5 (Co 0.5g).

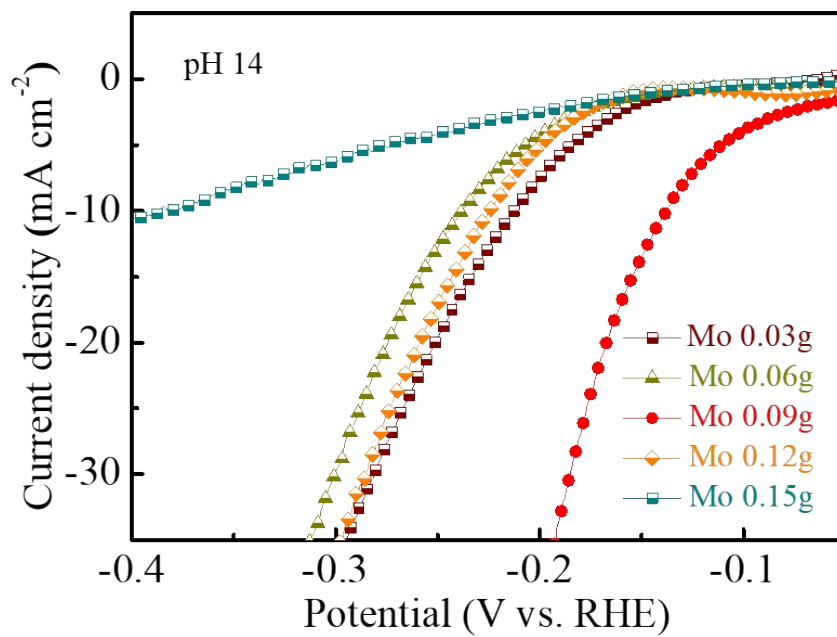

**Fig. S9** Polarization curves of samples with different Mo-doping amount.

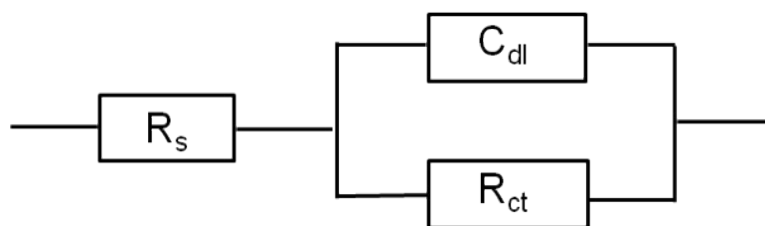

**Fig. S10** Electrical equivalent circuit used to simulate the Nyquist plots in Fig. 5C, where  $R_s$  is the electrolyte resistance,  $R_{ct}$  is the charge-transfer resistance, and  $C_{dl}$  represents the double-layer capacitance.

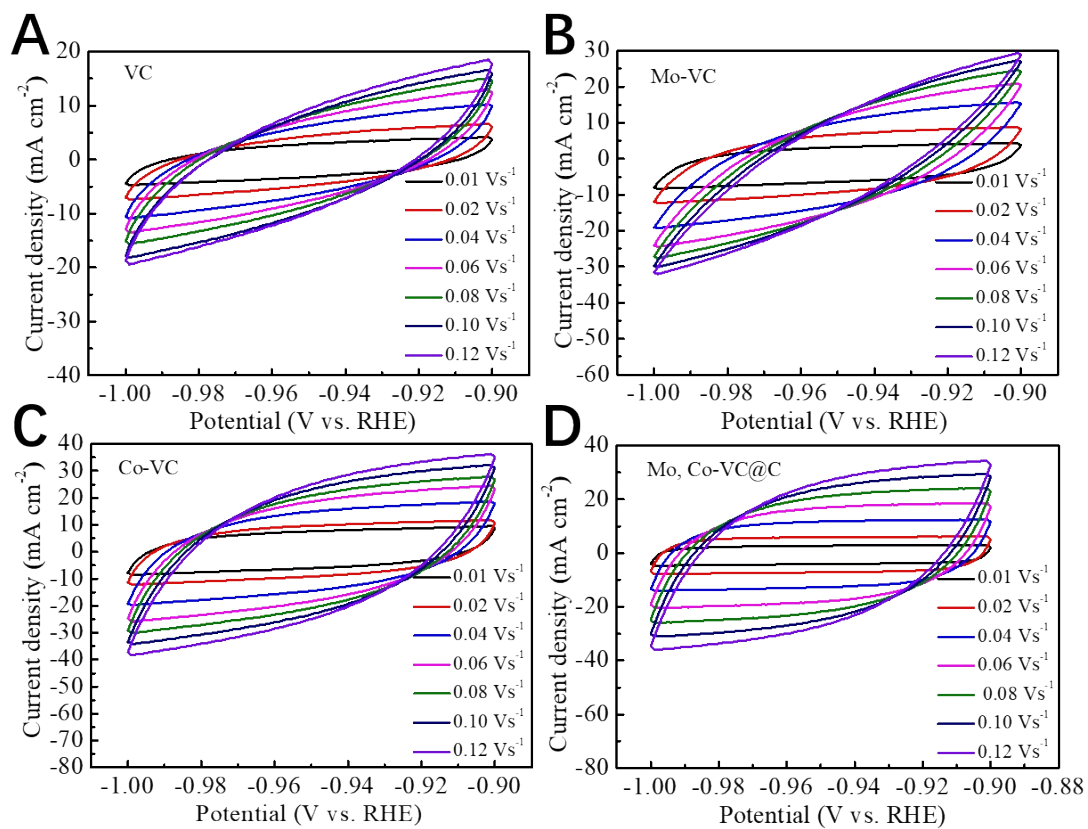

**Fig. S11** CV curves of (A) VC, (B) Mo-VC, (C) Co-VC and (D) Mo, Co-VC@C at different scan rates from 10 to 120 mV/s in 1 M KOH.

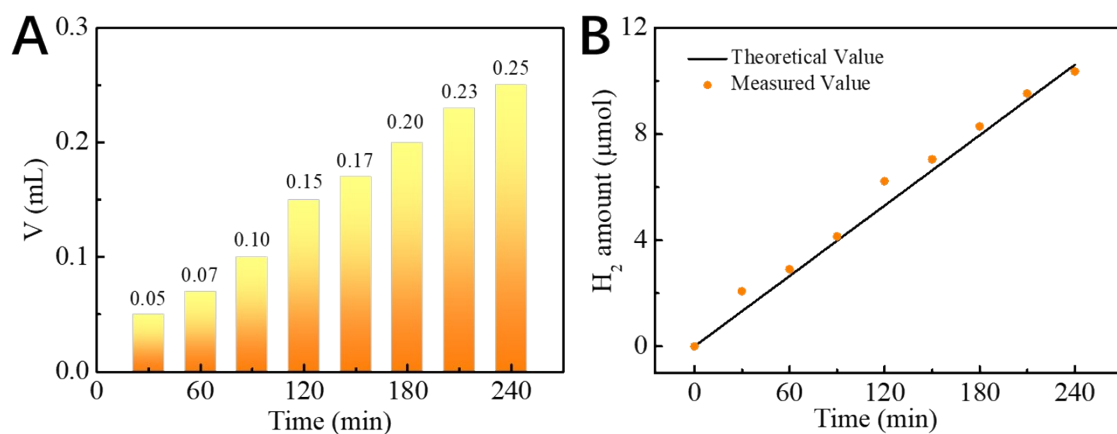

**Fig. S12** (A) The volume of the hydrogen-produced gas from the HER of Mo, Co-VC@C was recorded every 30 minutes; (B) Hydrogen production efficiency for HER under potentiostatic electrolysis with Mo, Co-VC@C at overpotential  $\eta_{10} = 233$  mV at pH 14.

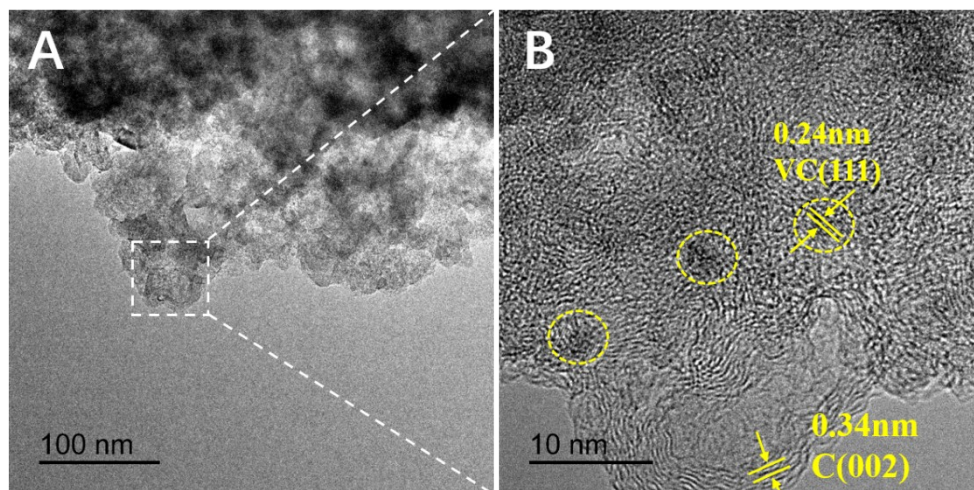

**Fig. S13 (A-B):** TEM and HRTEM images of Mo, Co-VC@C after the stability test of I-t curve for 110 h at pH 14.

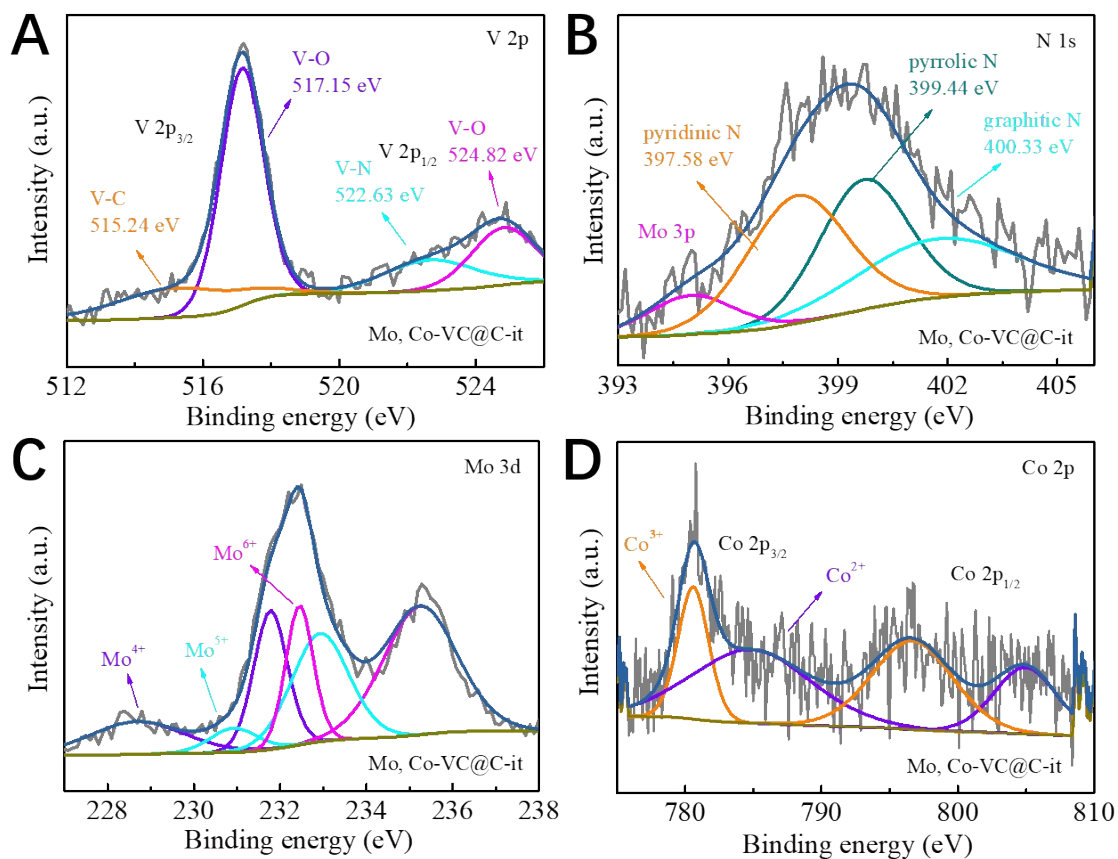

**Fig. S14** The XPS spectrum of Mo, Co-VC@C after HER durability test at pH 14: (A) V 2p, (B) N 1s, (C) Mo 3d, (D) Co 2p.

**Table S3.** Comparison of HER performance of reported TMCs electrocatalysts.

| Catalyst                          | Electrolyte                          | Current density( <i>j</i> ) | Overpotential at the corresponding <i>j</i> | Reference                                                    |
|-----------------------------------|--------------------------------------|-----------------------------|---------------------------------------------|--------------------------------------------------------------|
| Mo, Co-VC@C                       | 1 M KOH                              | 10 mA/cm <sup>2</sup>       | 137 mV                                      | This work                                                    |
| VC/NC                             | 1 M KOH                              | 10 mA/cm <sup>2</sup>       | 142 mV                                      | <i>J. Power Sources</i> <b>2021</b> , 490, 229551            |
|                                   | 0.5 M H <sub>2</sub> SO <sub>4</sub> | 10 mA/cm <sup>2</sup>       | 76 mV                                       |                                                              |
| VC@NC/CC                          | 1 M KOH                              | 100 mA/cm <sup>2</sup>      | 238 mV                                      | <i>ChemSusChem</i> <b>2020</b> , 13, 3671-3678               |
|                                   | 0.5 M H <sub>2</sub> SO <sub>4</sub> | 100 mA/cm <sup>2</sup>      | 461 mV                                      |                                                              |
| VC@NCNT                           | 1 M KOH                              | 10 mA/cm <sup>2</sup>       | 159 mV                                      | <i>Nanoscale</i> <b>2018</b> , 10, 14272-14279               |
|                                   | 0.5 M H <sub>2</sub> SO <sub>4</sub> | 10 mA/cm <sup>2</sup>       | 161 mV                                      |                                                              |
| Mo <sub>2</sub> C/VC@C            | 0.5 M H <sub>2</sub> SO <sub>4</sub> | 10 mA/cm <sup>2</sup>       | 122 mV                                      | <i>Nano Energy</i> <b>2019</b> , 60, 520-526                 |
| Mo <sub>2</sub> C/C               | 1 M KOH                              | 10 mA/cm <sup>2</sup>       | 125 mV                                      | <i>ACS Appl. Mater. Inter.</i> <b>2017</b> , 9, 41314-41322  |
|                                   | 0.5 M H <sub>2</sub> SO <sub>4</sub> | 10 mA/cm <sup>2</sup>       | 180 mV                                      |                                                              |
| Mo <sub>2</sub> C/KB              | 0.5 M H <sub>2</sub> SO <sub>4</sub> | 10 mA/cm <sup>2</sup>       | 180 mV                                      | <i>ACS Sustainable Chem. Eng.</i> <b>2018</b> , 6, 983–990   |
| MoC/NPC@CNTs                      | 0.5 M H <sub>2</sub> SO <sub>4</sub> | 10 mA/cm <sup>2</sup>       | 175 mV                                      | <i>Sustain. Energy Fuels</i> <b>2020</b> , 4, 407            |
| Co <sub>3</sub> Mo <sub>3</sub> C | 1 M KOH                              | 1 mA/cm <sup>2</sup>        | 72 mV                                       | <i>Inorg. Chem. Front.</i> <b>2019</b> , 6, 940-947          |
|                                   |                                      | 10 mA/cm <sup>2</sup>       | 169 mV                                      |                                                              |
| Co/Mo <sub>2</sub> C              | 1 M KOH                              | 10 mA/cm <sup>2</sup>       | 157 mV                                      | <i>Int. J. Hydrogen Energy</i> <b>2020</b> , 45, 21221-21231 |
| Ni-Mo/WC                          | 1 M KOH                              | 10 mA/cm <sup>2</sup>       | 134 mV                                      | <i>Int. J. Hydrogen Energy</i> <b>2021</b> , 46, 22813-22831 |
| W <sub>2</sub> C-HS               | 0.5 M H <sub>2</sub> SO <sub>4</sub> | 10 mA/cm <sup>2</sup>       | 153 mV                                      | <i>ACS Omega</i> <b>2019</b> , 4, 4185–4191                  |
|                                   |                                      | 100 mA/cm <sup>2</sup>      | 264 mV                                      |                                                              |
